# Supplementary material for: Clinical biomarkers and associations with healthspan and lifespan: Evidence from observational and genetic data
Source: PubMed Central journal article supplement (PMC8047464; doi:10.1016/j.ebiom.2021.103318), 2021-04-01
Supplement: mmc1.pdf [file mmc1.pdf]

## Supplementary files

### Contents

|                                                                                                                                               |           |
|-----------------------------------------------------------------------------------------------------------------------------------------------|-----------|
| Contents .....                                                                                                                                | 1         |
| <b>Supplementary Method 1 Validation in SATSA .....</b>                                                                                       | <b>2</b>  |
| <b>Supplementary Table 1 ICD codes related to the chronic diseases.....</b>                                                                   | <b>3</b>  |
| <b>Supplementary Table 2 Phenotype codes and data linkage of UKB summary statistics.....</b>                                                  | <b>5</b>  |
| <b>Supplementary Table 3 Serum biomarkers and PRSs .....</b>                                                                                  | <b>6</b>  |
| <b>Supplementary Table 4 Sex-specific characteristics of study participants .....</b>                                                         | <b>7</b>  |
| <b>Supplementary Table 5 Number of prevalent and incident events in all participants, men, and women.....</b>                                 | <b>9</b>  |
| <b>Supplementary Table 6 Associations of serum clinical biomarkers with healthspan and lifespan in all participants, men, and women .....</b> | <b>11</b> |
| <b>Supplementary Table 7 Validation of biomarker-healthspan associations in SATSA .....</b>                                                   | <b>14</b> |
| <b>Supplementary Table 8 Multiple-biomarkers regression.....</b>                                                                              | <b>15</b> |
| <b>Supplementary Table 9 Associations of biomarker PRSs with healthspan and lifespan in all participants, men, and women .....</b>            | <b>16</b> |
| <b>Supplementary Table 10 Associations of regional CRP PRS and death .....</b>                                                                | <b>18</b> |
| <b>Supplementary Table 11 Leave-one-disease-out sensitivity analysis.....</b>                                                                 | <b>19</b> |
| <b>Supplementary Figure 1 Study design and study population.....</b>                                                                          | <b>26</b> |
| <b>Supplementary Figure 2 Correlations of serum biomarkers .....</b>                                                                          | <b>27</b> |
| <b>Supplementary Figure 3 Leave-one-disease-out sensitivity analysis .....</b>                                                                | <b>28</b> |
| <b>Supplementary Figure 4 Sensitivity analysis with the exclusion of serum biomarker outliers.....</b>                                        | <b>29</b> |
| <b>Reference.....</b>                                                                                                                         | <b>30</b> |

## **Supplementary Method 1 Validation in SATSA**

SATSA is a sub-cohort of the Swedish Twin Registry (STR) <sup>1</sup>, but consists of completely independent participants compared to those participating in TwinGene. A maximum of 844 SATSA participants (341 men and 503 women) had the following information: 1) at least one serum biomarker assessed, 2) healthspan derived from disease diagnoses, 3) follow-up on all-cause mortality (as death is one of the healthspan-terminating conditions). In addition, a total of 542 SATSA participants had their genotypes assessed.

Briefly, we replicated the following procedures in SATSA: 1) developing the healthspan phenotype using the same definition in TwinGene; 2) selecting the first available biomarker assessment when repeated measurements are available (average age of 63.5 years), log transforming where required (FBG, HbA1c, TG, and CRP), and rescaling all biomarker values to units of one standard deviation; 3) using the same genetic loci and GWAS weights in TwinGene analysis to calculate the polygenic risk score (PRS) for FBG among SATSA participants; 4) re-examining the statistically significant biomarker-healthspan associations identified in TwinGene using the same statistical methods.

**Supplementary Table 1 ICD codes related to the chronic diseases**

|          | ICD-7 -1967                                                                                                                                                                     | ICD-8 1968-1986                                                                                                                                                                     | ICD-9 1987-1996                                                                                                                                                                                                | ICD-10 1997-                                                                                                                                                                                                                          |
|----------|---------------------------------------------------------------------------------------------------------------------------------------------------------------------------------|-------------------------------------------------------------------------------------------------------------------------------------------------------------------------------------|----------------------------------------------------------------------------------------------------------------------------------------------------------------------------------------------------------------|---------------------------------------------------------------------------------------------------------------------------------------------------------------------------------------------------------------------------------------|
| Diabetes | 260 Diabetes mellitus                                                                                                                                                           | 250 Diabetes mellitus                                                                                                                                                               | 250 Diabetes mellitus                                                                                                                                                                                          | E10 Insulin-dependent diabetes mellitus<br>E11 Non-insulin-dependent diabetes mellitus<br>E12 Malnutrition-related diabetes mellitus<br>E13 Other specified diabetes mellitus<br>E14 Unspecified diabetes mellitus                    |
| CHF      | 434.1 Congestive heart failure<br>434.2 Left ventricular failure                                                                                                                | 427.0 Congestive heart failure<br>427.1 Left ventricular failure                                                                                                                    | 428 Heart failure                                                                                                                                                                                              | I50 Heart failure                                                                                                                                                                                                                     |
| Cancer   | 140-207                                                                                                                                                                         | 140-209                                                                                                                                                                             | 140-208                                                                                                                                                                                                        | C00-C97<br>B21                                                                                                                                                                                                                        |
| MI       | 420 Arteriosclerotic heart disease, including coronary disease                                                                                                                  | 410 Acute myocardial infarction<br>411 Other acute and subacute forms of ischaemic heart disease<br>412 Chronic ischaemic heart disease<br>414 Asymptomatic ischaemic heart disease | 410 Acute myocardial infarction<br>411 Other acute and subacute forms of ischaemic heart disease<br>412 Old myocardial infarction<br>414 Other forms of chronic ischaemic heart disease                        | I21 Acute myocardial infarction<br>I22 Subsequent myocardial infarction<br>I23 Certain current complications following acute myocardial infarction<br>I24 Other acute ischaemic heart diseases<br>I25 Chronic ischaemic heart disease |
| Stroke   | 330 Subarachnoid haemorrhage<br>331 Cerebral haemorrhage<br>332 Cerebral embolism and thrombosis<br>334 Other and ill-defined vascular lesions affecting central nervous system | 430 Subarachnoid haemorrhage<br>431 Cerebral haemorrhage<br>433 Cerebral thrombosis<br>434 Cerebral embolism<br>436 Acute but ill-defined cerebrovascular disease                   | 430 Subarachnoid haemorrhage<br>431 Intracerebral haemorrhage<br>432 Other and unspecified intracranial haemorrhage<br>434 Occlusion of cerebral arteries<br>436 Acute but ill-defined cerebrovascular disease | I60 Subarachnoid haemorrhage<br>I61 Intracerebral haemorrhage<br>I62 Other nontraumatic intracranial haemorrhage<br>I63 Cerebral infarction<br>I64 Stroke, not specified as haemorrhage or infarction                                 |
| COPD     | 501 Bronchitis unqualified<br>502 Chronic bronchitis                                                                                                                            | 490 Bronchitis, unspecified<br>491 Chronic bronchitis<br>492 Emphysema                                                                                                              | 490 Bronchitis, not specified as acute or chronic<br>491 Chronic bronchitis<br>492 Emphysema<br>496 Chronic airways obstruction, not elsewhere classified                                                      | J40 Bronchitis, not specified as acute or chronic<br>J41 Simple and mucopurulent chronic bronchitis<br>J42 Unspecified chronic bronchitis<br>J43 Emphysema<br>J44 Other chronic obstructive pulmonary disease                         |
| Dementia | 304 Senile psychosis<br>305 Presenile psychosis<br>306 Psychosis with cerebral arteriosclerosis                                                                                 | 290 Senile and presenile dementia<br>293.0 Cerebral arteriosclerosis<br>293.1 Other cerebrovascular disturbances                                                                    | 290.0 Senile dementia, uncomplicated<br>290.1 Presenile dementia<br>290.4 Arteriosclerotic dementia<br>290.8 Other specified senile psychotic conditions                                                       | F00 Dementia in Alzheimer's disease<br>F01 Vascular dementia<br>F02 Dementia in other diseases classified elsewhere<br>F03 Unspecified dementia                                                                                       |

|       |                                             |        |                                                        |
|-------|---------------------------------------------|--------|--------------------------------------------------------|
| 290.9 | Unspecified senile psychotic condition      | F05.1  | Delirium superimposed on dementia                      |
| 294.1 | Dementia in conditions classified elsewhere | G30    | Alzheimer's disease                                    |
| 331.0 | Alzheimer's disease                         | G31.1  | Senile degeneration of brain, not elsewhere classified |
| 331.1 | Pick's disease                              | G31.8A | Lewy body dementia                                     |
| 331.2 | Senile degeneration of brain                |        |                                                        |
| 331.9 | Cerebral degeneration, unspecified          |        |                                                        |

MI myocardial infarction, CHF coronary heart failure, COPD chronic obstructive pulmonary disease.

**Supplementary Table 2 Phenotype codes and data linkage of UKB summary statistics**

|            | Phenotype Code | Phenotype Description           | Dropbox File                                                                                                                                                                                          |
|------------|----------------|---------------------------------|-------------------------------------------------------------------------------------------------------------------------------------------------------------------------------------------------------|
| FBG GWAS   | 30740_raw      | Glucose (mmol/L)                | <a href="https://www.dropbox.com/s/2ay8s1ctsm0m3qv/30740_raw.gwas.imputed_v3-both_sexes.tsv.bgz?dl=0">https://www.dropbox.com/s/2ay8s1ctsm0m3qv/30740_raw.gwas.imputed_v3-both_sexes.tsv.bgz?dl=0</a> |
| HbA1c GWAS | 30750_raw      | Glycated haemoglobin (mmol/mol) | <a href="https://www.dropbox.com/s/c4sgeauksc2cizh/30750_raw.gwas.imputed_v3-both_sexes.tsv.bgz?dl=0">https://www.dropbox.com/s/c4sgeauksc2cizh/30750_raw.gwas.imputed_v3-both_sexes.tsv.bgz?dl=0</a> |
| TG GWAS    | 30870_raw      | Triglycerides (mmol/L)          | <a href="https://www.dropbox.com/s/0tdxu9g7itbct6m/30870_raw.gwas.imputed_v3-both_sexes.tsv.bgz?dl=0">https://www.dropbox.com/s/0tdxu9g7itbct6m/30870_raw.gwas.imputed_v3-both_sexes.tsv.bgz?dl=0</a> |
| TC GWAS    | 30690_raw      | Cholesterol (mmol/L)            | <a href="https://www.dropbox.com/s/a634mjw9gpitjy4/30690_raw.gwas.imputed_v3-both_sexes.tsv.bgz?dl=0">https://www.dropbox.com/s/a634mjw9gpitjy4/30690_raw.gwas.imputed_v3-both_sexes.tsv.bgz?dl=0</a> |
| LDL-C GWAS | 30780_raw      | LDL direct (mmol/L)             | <a href="https://www.dropbox.com/s/2msvdv4axfz362b/30780_raw.gwas.imputed_v3-both_sexes.tsv.bgz?dl=0">https://www.dropbox.com/s/2msvdv4axfz362b/30780_raw.gwas.imputed_v3-both_sexes.tsv.bgz?dl=0</a> |
| ApoB GWAS  | 30640_raw      | Apolipoprotein B (g/L)          | <a href="https://www.dropbox.com/s/otgruelc6ir0r87/30640_raw.gwas.imputed_v3-both_sexes.tsv.bgz?dl=0">https://www.dropbox.com/s/otgruelc6ir0r87/30640_raw.gwas.imputed_v3-both_sexes.tsv.bgz?dl=0</a> |
| HDL-C GWAS | 30760_raw      | HDL cholesterol (mmol/L)        | <a href="https://www.dropbox.com/s/sn30890f64p0htu/30760_raw.gwas.imputed_v3-both_sexes.tsv.bgz?dl=0">https://www.dropbox.com/s/sn30890f64p0htu/30760_raw.gwas.imputed_v3-both_sexes.tsv.bgz?dl=0</a> |
| ApoA GWAS  | 30630_raw      | Apolipoprotein A (g/L)          | <a href="https://www.dropbox.com/s/jkedtnnmx2ccfy/30630_raw.gwas.imputed_v3-both_sexes.tsv.bgz?dl=0">https://www.dropbox.com/s/jkedtnnmx2ccfy/30630_raw.gwas.imputed_v3-both_sexes.tsv.bgz?dl=0</a>   |
| CRP GWAS   | 30710_raw      | C-reactive protein (mg/L)       | <a href="https://www.dropbox.com/s/i8hg3jlc8fetcob/30710_raw.gwas.imputed_v3-both_sexes.tsv.bgz?dl=0">https://www.dropbox.com/s/i8hg3jlc8fetcob/30710_raw.gwas.imputed_v3-both_sexes.tsv.bgz?dl=0</a> |
| Hb GWAS    | 30020_raw      | Haemoglobin concentration       | <a href="https://www.dropbox.com/s/rvpbvobej0f3ryl/30020_raw.gwas.imputed_v3-both_sexes.tsv.bgz?dl=0">https://www.dropbox.com/s/rvpbvobej0f3ryl/30020_raw.gwas.imputed_v3-both_sexes.tsv.bgz?dl=0</a> |

Additional information can be found at

<https://docs.google.com/spreadsheets/d/1kvPoupSzsSFBNSztMzl04xMoSC3Kcx3CrjVf4yBmESU/edit?ts=5b5f17db#gid=178908679>

**Supplementary Table 3 Serum biomarkers and PRSs**

| Phenotype<br>(unit: SD) | PRS<br>(unit:<br>SD) | Number of SNPs included in<br>the PRS calculation | Phenotype-PRS association<br>(beta coefficient) | Phenotype-PRS<br>association (P value) | phenotypic variance<br>explained by PRS |
|-------------------------|----------------------|---------------------------------------------------|-------------------------------------------------|----------------------------------------|-----------------------------------------|
| Serum FBG               | FBG<br>PRS           | 63                                                | 0.11                                            | 1.49e-44                               | 1.9%                                    |
| Serum<br>HbA1c          | HbA1c<br>PRS         | 310                                               | 0.18                                            | 3.12e-115                              | 4.9%                                    |
| Serum TG                | TG PRS               | 425                                               | 0.25                                            | 4.93e-169                              | 7.2%                                    |
| Serum TC                | TC PRS               | 391                                               | 0.24                                            | 1.14e-136                              | 5.7%                                    |
| Serum LDL-<br>C         | LDL-C<br>PRS         | 355                                               | 0.25                                            | 1.57e-138                              | 5.9%                                    |
| Serum<br>ApoB           | ApoB<br>PRS          | 410                                               | 0.27                                            | 9.53e-176                              | 7.5%                                    |
| Serum<br>HDL-C          | HDL-C<br>PRS         | 590                                               | 0.30                                            | 1.16e-241                              | 8.8%                                    |
| Serum<br>ApoA1          | ApoA1<br>PRS         | 514                                               | 0.28                                            | 4.18e-207                              | 7.7%                                    |
| Serum CRP               | CRP<br>PRS           | 95                                                | 0.14                                            | 1.00e-134                              | 5.7%                                    |
| Serum Hb                | Hb PRS               | 503                                               | 0.18                                            | 2.92e-94                               | 3.1%                                    |

FBG fasting blood glucose, HbA1c hemoglobin A1C, TC total cholesterol, HDL-C high-density lipoprotein cholesterol, LDL-C low-density lipoprotein cholesterol, ApoA1 Apolipoprotein A1, ApoB Apolipoprotein B, TG triglyceride, CRP C-reactive protein, Hb hemoglobin.

**Supplementary Table 4 Sex-specific characteristics of study participants**

|                                                                   | Healthspan cohort |              |                  | Lifespan cohort |              |                  |
|-------------------------------------------------------------------|-------------------|--------------|------------------|-----------------|--------------|------------------|
|                                                                   | Men               | Women        | P <sub>sex</sub> | Men             | Women        | P <sub>sex</sub> |
| Number of individuals                                             | 4110              | 5428         |                  | 5469            | 6629         |                  |
| Number of twin pairs/individuals <sup>1</sup>                     |                   |              |                  |                 |              |                  |
| MZ pairs                                                          | 340 (16.5%)       | 540 (19.9%)  |                  | 538 (19.7%)     | 769 (23.2%)  |                  |
| Same-sex DZ pairs                                                 | 421 (20.5%)       | 738 (27.2%)  |                  | 720 (26.3%)     | 1048 (31.6%) |                  |
| Single individuals <sup>2</sup>                                   | 2584 (62.9%)      | 2872 (52.9%) |                  | 2949 (53.9%)    | 2995 (45.2%) |                  |
| <b>Baseline characteristics <sup>3</sup> (N [%] or Mean [SD])</b> |                   |              |                  |                 |              |                  |
| Age (year)                                                        | 64.0 (7.6)        | 63.8 (7.9)   | 0.218            | 65.3 (8.0)      | 64.6 (8.2)   | <0.001           |
| Education (year)                                                  | 10.9 (3.2)        | 10.9 (3.2)   | 0.346            | 10.7 (3.3)      | 10.8 (3.2)   | 0.027            |
| BMI (kg/m <sup>2</sup> )                                          | 26.0 (3.4)        | 25.5 (4.1)   | <0.001           | 26.2 (3.4)      | 25.6 (4.2)   | <0.001           |
| Ever-smokers                                                      | 2433 (59.2%)      | 2800 (51.6%) | <0.001           | 3311 (60.5%)    | 3465 (52.3%) | <0.001           |
| Statin-users                                                      | 266 (6.5%)        | 328 (6.0%)   | 0.393            | 626 (11.4%)     | 532 (8.0%)   | <0.001           |
| <b>Prevalent diseases at baseline (N [%])</b>                     |                   |              |                  |                 |              |                  |
| Cancer                                                            | 0 (0.0%)          | 0 (0.0%)     |                  | 536 (9.8%)      | 685 (10.3%)  | 0.347            |
| Diabetes                                                          | 0 (0.0%)          | 0 (0.0%)     |                  | 293 (5.4%)      | 189 (2.9%)   | <0.001           |
| MI                                                                | 0 (0.0%)          | 0 (0.0%)     |                  | 502 (9.2%)      | 184 (2.8%)   | <0.001           |
| CHF                                                               | 0 (0.0%)          | 0 (0.0%)     |                  | 133 (2.4%)      | 86 (1.3%)    | <0.001           |
| Stroke                                                            | 0 (0.0%)          | 0 (0.0%)     |                  | 192 (3.5%)      | 156 (2.4%)   | <0.001           |
| COPD                                                              | 0 (0.0%)          | 0 (0.0%)     |                  | 86 (1.6%)       | 106 (1.6%)   | 0.942            |
| Dementia                                                          | 0 (0.0%)          | 0 (0.0%)     |                  | 15 (0.3%)       | 6 (0.1%)     |                  |
| Any prevalent chronic disease <sup>4</sup>                        | 0 (0.0%)          | 0 (0.0%)     |                  | 1359 (24.8%)    | 1201 (18.1%) | <0.001           |
| <b>Serum biomarkers at baseline (Mean [SD] or Median [IQR])</b>   |                   |              |                  |                 |              |                  |
| FBG (mmol/L; median)                                              | 5.4 (0.7)         | 5.2 (0.7)    | <0.001           | 5.5 (0.9)       | 5.2 (0.7)    | <0.001           |
| HbA1c (%; median)                                                 | 4.6 (0.4)         | 4.6 (0.4)    | 0.386            | 4.7 (0.5)       | 4.7 (0.4)    | <0.001           |
| TG (mmol/L; median)                                               | 1.2 (0.8)         | 1.1 (0.7)    | <0.001           | 1.2 (0.8)       | 1.1 (0.7)    | <0.001           |
| TC (mmol/L)                                                       | 5.7 (1.0)         | 6.1 (1.1)    | <0.001           | 5.5 (1.1)       | 6.0 (1.1)    | <0.001           |
| HDL-C (mmol/L)                                                    | 1.3 (0.3)         | 1.6 (0.4)    | <0.001           | 1.2 (0.3)       | 1.6 (0.4)    | <0.001           |
| LDL-C (mmol/L)                                                    | 3.8 (0.9)         | 3.9 (1.0)    | <0.001           | 3.7 (1.0)       | 3.9 (1.0)    | <0.001           |
| ApoA1 (g/L)                                                       | 1.6 (0.3)         | 1.8 (0.3)    | <0.001           | 1.5 (0.3)       | 1.7 (0.3)    | <0.001           |
| ApoB (g/L)                                                        | 1.09 (0.24)       | 1.10 (0.24)  | 0.025            | 1.06 (0.24)     | 1.09 (0.24)  | <0.001           |
| CRP (mg/L; median)                                                | 1.6 (2.5)         | 1.6 (2.6)    | 0.890            | 1.6 (2.7)       | 1.7 (2.8)    | 0.690            |
| Hb (g/L)                                                          | 149.4 (10.2)      | 137.3 (9.6)  | <0.001           | 148.6 (11.0)    | 137.0 (9.9)  | <0.001           |
| <b>Follow-up information (N [%] or Median [IQR])</b>              |                   |              |                  |                 |              |                  |
| Follow-up time (year)                                             | 9.2 (4.4)         | 9.6 (2.3)    |                  | 13.0 (1.5)      | 13.0 (1.5)   |                  |
| Number of incident cases                                          | 1852 (45.1%)      | 1829 (33.7%) |                  | 1455 (26.6%)    | 1219 (18.4%) |                  |
| Onset age of incident cases                                       | 71.9 (10.7)       | 72.7 (12.5)  |                  | 81.1 (11.8)     | 82.5 (13.1)  |                  |

<sup>1</sup> Two twin pairs with unknown zygosity were not shown in the table.

<sup>2</sup> Individuals whose co-twins were not included

<sup>3</sup> Baseline survey refers to the blood sampling conducted in 2004-2008

<sup>4</sup> Including cancer, diabetes, MI, CHF, stroke, COPD, and dementia.

MZ monozygotic, DZ dizygotic, N number of individuals, SD standard deviation, MI myocardial infarction, CHF coronary heart failure, COPD chronic obstructive pulmonary disease, FBG fasting blood glucose, HbA1c hemoglobin A1C, TC total cholesterol, HDL-C high-density lipoprotein cholesterol, LDL-C low-density lipoprotein cholesterol, ApoA1 Apolipoprotein A1, ApoB Apolipoprotein B, TG triglyceride, CRP C-reactive protein, Hb hemoglobin.



**Supplementary Table 5 Number of prevalent and incident events in all participants, men, and women**

|       | Event                | Number of individuals | Number of event-free individuals at baseline | Mean age at baseline | Median follow-up year | Number of incident cases | Proportion of incident cases | Median onset age of incident cases |
|-------|----------------------|-----------------------|----------------------------------------------|----------------------|-----------------------|--------------------------|------------------------------|------------------------------------|
| All   | Diabetes             | 12098                 | 11616                                        | 64.8                 | 9.8                   | 831                      | 7.2%                         | 73.1                               |
| All   | CHF                  | 12098                 | 11879                                        | 64.7                 | 9.8                   | 845                      | 7.1%                         | 78.9                               |
| All   | MI                   | 12098                 | 11412                                        | 64.6                 | 9.8                   | 881                      | 7.7%                         | 74.5                               |
| All   | Stroke               | 12098                 | 11750                                        | 64.7                 | 9.8                   | 746                      | 6.3%                         | 76.7                               |
| All   | Cancer               | 12098                 | 10877                                        | 64.5                 | 9.7                   | 2303                     | 21.2%                        | 72.1                               |
| All   | COPD                 | 12098                 | 11906                                        | 64.8                 | 9.8                   | 486                      | 4.1%                         | 73.8                               |
| All   | Dementia             | 12098                 | 12077                                        | 64.9                 | 9.8                   | 541                      | 4.5%                         | 80.4                               |
| All   | Death up to 20161231 | 12098                 | 12098                                        | 64.9                 | 9.8                   | 1788                     | 14.8%                        | 80.2                               |
| All   | Any chronic disease  | 12098                 | 9538                                         | 63.9                 | 9.5                   | 3681                     | 38.6%                        | 72.3                               |
| All   | Death                | 12098                 | 12098                                        | 64.9                 | 13                    | 2674                     | 22.1%                        | 81.7                               |
| Men   | Diabetes             | 5469                  | 5176                                         | 65.1                 | 9.7                   | 452                      | 8.7%                         | 72.8                               |
| Men   | CHF                  | 5469                  | 5336                                         | 65.1                 | 9.8                   | 480                      | 9%                           | 78                                 |
| Men   | MI                   | 5469                  | 4967                                         | 64.8                 | 9.7                   | 564                      | 11.4%                        | 74.1                               |
| Men   | Stroke               | 5469                  | 5277                                         | 65.1                 | 9.8                   | 440                      | 8.3%                         | 76.2                               |
| Men   | Cancer               | 5469                  | 4933                                         | 64.8                 | 9.6                   | 1226                     | 24.9%                        | 72.5                               |
| Men   | COPD                 | 5469                  | 5383                                         | 65.2                 | 9.8                   | 236                      | 4.4%                         | 74.6                               |
| Men   | Dementia             | 5469                  | 5454                                         | 65.2                 | 9.8                   | 247                      | 4.5%                         | 79.8                               |
| Men   | Death up to 20161231 | 5469                  | 5469                                         | 65.3                 | 9.8                   | 993                      | 18.2%                        | 80                                 |
| Men   | Any chronic disease  | 5469                  | 4110                                         | 64                   | 9.2                   | 1852                     | 45.1%                        | 71.9                               |
| Men   | Death                | 5469                  | 5469                                         | 65.3                 | 13                    | 1455                     | 26.6%                        | 81.1                               |
| Women | Diabetes             | 6629                  | 6440                                         | 64.5                 | 9.8                   | 379                      | 5.9%                         | 73.6                               |
| Women | CHF                  | 6629                  | 6543                                         | 64.5                 | 9.8                   | 365                      | 5.6%                         | 79.6                               |
| Women | MI                   | 6629                  | 6445                                         | 64.4                 | 9.8                   | 317                      | 4.9%                         | 75                                 |
| Women | Stroke               | 6629                  | 6473                                         | 64.5                 | 9.8                   | 306                      | 4.7%                         | 76.8                               |
| Women | Cancer               | 6629                  | 5944                                         | 64.3                 | 9.7                   | 1077                     | 18.1%                        | 71.8                               |
| Women | COPD                 | 6629                  | 6523                                         | 64.5                 | 9.8                   | 250                      | 3.8%                         | 72.9                               |

|       |                         |      |      |      |     |      |       |      |
|-------|-------------------------|------|------|------|-----|------|-------|------|
| Women | Dementia                | 6629 | 6623 | 64.6 | 9.8 | 294  | 4.4%  | 80.7 |
| Women | Death up to<br>20161231 | 6629 | 6629 | 64.6 | 9.8 | 795  | 12%   | 80.3 |
| Women | Any chronic disease     | 6629 | 5428 | 63.8 | 9.6 | 1829 | 33.7% | 72.7 |
| Women | Death                   | 6629 | 6629 | 64.6 | 13  | 1219 | 18.4% | 82.5 |

---

MI myocardial infarction, CHF coronary heart failure, COPD chronic obstructive pulmonary disease.

**Supplementary Table 6 Associations of serum clinical biomarkers with healthspan and lifespan in all participants, men, and women**

| Group | Outcome             | Serum biomarker | Number of individuals | Number of events | Median follow-up year | HR (95%CI)        | FDR-corrected P value | Raw P value |
|-------|---------------------|-----------------|-----------------------|------------------|-----------------------|-------------------|-----------------------|-------------|
| All   | Any chronic disease | FBG             | 9538                  | 3681             | 9.5                   | 1.28 (1.23, 1.33) | 5.15e-33              | 1.03e-33    |
| All   | Any chronic disease | HbA1c           | 9538                  | 3681             | 9.5                   | 1.29 (1.24, 1.34) | 9.07e-37              | 9.07e-38    |
| All   | Any chronic disease | TG              | 9538                  | 3681             | 9.5                   | 1.07 (1.03, 1.11) | 0.001                 | 6.05e-04    |
| All   | Any chronic disease | TC              | 9538                  | 3681             | 9.5                   | 0.96 (0.92, 0.99) | 0.022                 | 0.015       |
| All   | Any chronic disease | LDL-C           | 9538                  | 3681             | 9.5                   | 0.96 (0.93, 1.00) | 0.060                 | 0.048       |
| All   | Any chronic disease | ApoB            | 9538                  | 3681             | 9.5                   | 1.00 (0.96, 1.03) | 0.833                 | 0.833       |
| All   | Any chronic disease | HDL-C           | 9538                  | 3681             | 9.5                   | 0.92 (0.89, 0.96) | 1.51e-04              | 6.03e-05    |
| All   | Any chronic disease | ApoA1           | 9538                  | 3681             | 9.5                   | 0.93 (0.89, 0.96) | 2.12e-04              | 1.06e-04    |
| All   | Any chronic disease | CRP             | 9538                  | 3681             | 9.5                   | 1.11 (1.08, 1.15) | 2.21e-09              | 6.62e-10    |
| All   | Any chronic disease | Hb              | 9538                  | 3681             | 9.5                   | 0.99 (0.95, 1.03) | 0.791                 | 0.711       |
| All   | Death               | FBG             | 12098                 | 2674             | 13.0                  | 1.18 (1.13, 1.22) | 5.45e-17              | 1.09e-17    |
| All   | Death               | HbA1c           | 12098                 | 2674             | 13.0                  | 1.22 (1.17, 1.26) | 6.42e-28              | 6.42e-29    |
| All   | Death               | TG              | 12098                 | 2674             | 13.0                  | 1.12 (1.07, 1.17) | 1.76e-06              | 1.23e-06    |
| All   | Death               | TC              | 12098                 | 2674             | 13.0                  | 0.90 (0.86, 0.94) | 1.76e-06              | 1.07e-06    |
| All   | Death               | LDL-C           | 12098                 | 2674             | 13.0                  | 0.89 (0.85, 0.93) | 2.14e-07              | 8.56e-08    |
| All   | Death               | ApoB            | 12098                 | 2674             | 13.0                  | 0.95 (0.91, 0.99) | 0.016                 | 0.016       |
| All   | Death               | HDL-C           | 12098                 | 2674             | 13.0                  | 0.91 (0.86, 0.96) | 2.74e-04              | 2.47e-04    |
| All   | Death               | ApoA1           | 12098                 | 2674             | 13.0                  | 0.91 (0.87, 0.96) | 1.72e-04              | 1.38e-04    |
| All   | Death               | CRP             | 12098                 | 2674             | 13.0                  | 1.15 (1.10, 1.20) | 8.17e-11              | 2.45e-11    |
| All   | Death               | Hb              | 12098                 | 2674             | 13.0                  | 0.89 (0.85, 0.93) | 6.40e-07              | 3.20e-07    |
| Men   | Any chronic disease | FBG             | 4110                  | 1852             | 9.2                   | 1.23 (1.16, 1.29) | 4.50e-14              | 9.01e-15    |
| Men   | Any chronic disease | HbA1c           | 4110                  | 1852             | 9.2                   | 1.25 (1.19, 1.32) | 1.77e-16              | 1.77e-17    |
| Men   | Any chronic disease | TG              | 4110                  | 1852             | 9.2                   | 1.08 (1.02, 1.14) | 0.011                 | 0.004       |

|       |                     |       |      |      |      |                   |          |          |
|-------|---------------------|-------|------|------|------|-------------------|----------|----------|
| Men   | Any chronic disease | TC    | 4110 | 1852 | 9.2  | 0.98 (0.93, 1.04) | 0.599    | 0.534    |
| Men   | Any chronic disease | LDL-C | 4110 | 1852 | 9.2  | 0.99 (0.94, 1.04) | 0.599    | 0.599    |
| Men   | Any chronic disease | ApoB  | 4110 | 1852 | 9.2  | 1.02 (0.97, 1.08) | 0.537    | 0.376    |
| Men   | Any chronic disease | HDL-C | 4110 | 1852 | 9.2  | 0.92 (0.86, 0.98) | 0.014    | 0.007    |
| Men   | Any chronic disease | ApoA1 | 4110 | 1852 | 9.2  | 0.93 (0.88, 0.98) | 0.021    | 0.012    |
| Men   | Any chronic disease | CRP   | 4110 | 1852 | 9.2  | 1.09 (1.05, 1.15) | 3.50e-04 | 1.05e-04 |
| Men   | Any chronic disease | Hb    | 4110 | 1852 | 9.2  | 0.99 (0.93, 1.04) | 0.599    | 0.592    |
| Women | Any chronic disease | FBG   | 5428 | 1829 | 9.6  | 1.35 (1.28, 1.43) | 6.33e-24 | 6.33e-25 |
| Women | Any chronic disease | HbA1c | 5428 | 1829 | 9.6  | 1.35 (1.28, 1.44) | 2.69e-23 | 5.38e-24 |
| Women | Any chronic disease | TG    | 5428 | 1829 | 9.6  | 1.07 (1.01, 1.13) | 0.038    | 0.027    |
| Women | Any chronic disease | TC    | 5428 | 1829 | 9.6  | 0.93 (0.89, 0.98) | 0.016    | 0.010    |
| Women | Any chronic disease | LDL-C | 5428 | 1829 | 9.6  | 0.95 (0.90, 1.00) | 0.050    | 0.040    |
| Women | Any chronic disease | ApoB  | 5428 | 1829 | 9.6  | 0.98 (0.93, 1.03) | 0.380    | 0.342    |
| Women | Any chronic disease | HDL-C | 5428 | 1829 | 9.6  | 0.92 (0.88, 0.97) | 0.006    | 0.002    |
| Women | Any chronic disease | ApoA1 | 5428 | 1829 | 9.6  | 0.92 (0.88, 0.97) | 0.006    | 0.003    |
| Women | Any chronic disease | CRP   | 5428 | 1829 | 9.6  | 1.14 (1.08, 1.20) | 8.04e-06 | 2.41e-06 |
| Women | Any chronic disease | Hb    | 5428 | 1829 | 9.6  | 1.00 (0.95, 1.07) | 0.892    | 0.892    |
| Men   | Death               | FBG   | 5469 | 1455 | 13.0 | 1.18 (1.13, 1.24) | 1.88e-11 | 3.76e-12 |
| Men   | Death               | HbA1c | 5469 | 1455 | 13.0 | 1.22 (1.17, 1.28) | 1.47e-18 | 1.47e-19 |
| Men   | Death               | TG    | 5469 | 1455 | 13.0 | 1.11 (1.05, 1.18) | 4.31e-04 | 3.02e-04 |
| Men   | Death               | TC    | 5469 | 1455 | 13.0 | 0.89 (0.84, 0.95) | 3.52e-04 | 2.11e-04 |
| Men   | Death               | LDL-C | 5469 | 1455 | 13.0 | 0.88 (0.83, 0.94) | 1.27e-04 | 5.06e-05 |
| Men   | Death               | ApoB  | 5469 | 1455 | 13.0 | 0.96 (0.91, 1.02) | 0.151    | 0.151    |
| Men   | Death               | HDL-C | 5469 | 1455 | 13.0 | 0.88 (0.82, 0.95) | 0.002    | 0.002    |
| Men   | Death               | ApoA1 | 5469 | 1455 | 13.0 | 0.90 (0.84, 0.96) | 0.003    | 0.003    |
| Men   | Death               | CRP   | 5469 | 1455 | 13.0 | 1.15 (1.09, 1.21) | 5.83e-07 | 1.75e-07 |

|       |       |       |      |      |      |                   |          |          |
|-------|-------|-------|------|------|------|-------------------|----------|----------|
| Men   | Death | Hb    | 5469 | 1455 | 13.0 | 0.89 (0.84, 0.95) | 2.80e-04 | 1.40e-04 |
| Women | Death | FBG   | 6629 | 1219 | 13.0 | 1.17 (1.10, 1.24) | 2.77e-06 | 5.54e-07 |
| Women | Death | HbA1c | 6629 | 1219 | 13.0 | 1.20 (1.14, 1.27) | 5.48e-10 | 5.48e-11 |
| Women | Death | TG    | 6629 | 1219 | 13.0 | 1.11 (1.04, 1.19) | 0.004    | 0.003    |
| Women | Death | TC    | 6629 | 1219 | 13.0 | 0.90 (0.85, 0.96) | 0.001    | 8.98e-04 |
| Women | Death | LDL-C | 6629 | 1219 | 13.0 | 0.90 (0.84, 0.95) | 8.51e-04 | 4.25e-04 |
| Women | Death | ApoB  | 6629 | 1219 | 13.0 | 0.94 (0.89, 1.00) | 0.039    | 0.039    |
| Women | Death | HDL-C | 6629 | 1219 | 13.0 | 0.93 (0.87, 0.99) | 0.033    | 0.029    |
| Women | Death | ApoA1 | 6629 | 1219 | 13.0 | 0.92 (0.86, 0.98) | 0.018    | 0.015    |
| Women | Death | CRP   | 6629 | 1219 | 13.0 | 1.16 (1.09, 1.24) | 1.78e-05 | 5.33e-06 |
| Women | Death | Hb    | 6629 | 1219 | 13.0 | 0.88 (0.82, 0.94) | 4.81e-04 | 1.93e-04 |

FBG fasting blood glucose, HbA1c hemoglobin A1C, TC total cholesterol, HDL-C high-density lipoprotein cholesterol, LDL-C low-density lipoprotein cholesterol, ApoA1 Apolipoprotein A1, ApoB Apolipoprotein B, TG triglyceride, CRP C-reactive protein, Hb hemoglobin.

**Supplementary Table 7 Validation of biomarker-healthspan associations in SATSA**

| Biomarker    | SATSA                 |                          |                       |                   |             | Effect directions in SATSA and in TwinGene | HR (95%CI) in TwinGene |
|--------------|-----------------------|--------------------------|-----------------------|-------------------|-------------|--------------------------------------------|------------------------|
|              | Number of individuals | Number of chronic events | Median follow-up year | HR (95%CI)        | Raw P value |                                            |                        |
| <b>Serum</b> |                       |                          |                       |                   |             |                                            |                        |
| HbA1c        | 117                   | 34                       | 3.3                   | 1.13 (0.56, 2.27) | 0.727       | --                                         | 1.29 (1.24, 1.34)      |
| FBG          | 759                   | 642                      | 14.9                  | 1.18 (1.09, 1.29) | 1.36e-4     | -- *                                       | 1.28 (1.23, 1.33)      |
| CRP          | 242                   | 142                      | 7.7                   | 1.21 (1.03, 1.41) | 0.018       | -- *                                       | 1.11 (1.08, 1.15)      |
| TG           | 735                   | 619                      | 15.0                  | 1.06 (0.97, 1.16) | 0.176       | --                                         | 1.07 (1.03, 1.11)      |
| TC           | 735                   | 619                      | 15.0                  | 1.03 (0.96, 1.11) | 0.421       | +-                                         | 0.96 (0.92, 0.99)      |
| ApoA1        | 737                   | 621                      | 14.9                  | 0.94 (0.86, 1.02) | 0.153       | ++                                         | 0.93 (0.89, 0.96)      |
| HDL-C        | 687                   | 576                      | 14.0                  | 0.89 (0.82, 0.96) | 0.002       | ++ *                                       | 0.92 (0.89, 0.96)      |
| <b>PRS</b>   |                       |                          |                       |                   |             |                                            |                        |
| FBG          | 492                   | 406                      | 15.3                  | 1.04 (0.95, 1.15) | 0.382       | --                                         | 1.05 (1.02, 1.09)      |

HRs indicate the relative risk of experiencing any chronic event associated with one-SD increase in serum biomarker concentrations or FBG PRS.

Significant effects (- risk factor, + protective factor) found in both TwinGene (FDR-adjusted P<0.05) and SATSA (raw P<0.05) were marked by \*.

HbA1c hemoglobin A1C, FBG fasting blood glucose, CRP C-reactive protein, TG triglyceride, TC total cholesterol, ApoA1 Apolipoprotein A1, HDL-C high-density lipoprotein cholesterol, PRS polygenic risk score, HR hazard ratio, CI confidence interval.

**Supplementary Table 8 Multiple-biomarkers regression**

| Serum biomarkers included in the final model | HR (95%CI)        | Raw P value |
|----------------------------------------------|-------------------|-------------|
| Healthspan model                             |                   |             |
| FBG                                          | 1.14 (1.08, 1.20) | 1.54e-06    |
| HbA1c                                        | 1.17 (1.11, 1.23) | 5.95e-09    |
| TG                                           | 1.05 (1.01, 1.09) | 0.020       |
| TC                                           | 0.86 (0.77, 0.96) | 0.008       |
| LDL-C                                        | 1.11 (1.00, 1.24) | 0.051       |
| CRP                                          | 1.10 (1.07, 1.14) | 1.65e-08    |
| Lifespan model                               |                   |             |
| FBG                                          | 1.04 (0.99, 1.10) | 0.121       |
| HbA1c                                        | 1.14 (1.08, 1.20) | 6.23e-07    |
| TG                                           | 1.12 (1.07, 1.17) | 3.42e-06    |
| TC                                           | 0.91 (0.88, 0.95) | 1.87e-05    |
| Hb                                           | 0.92 (0.88, 0.96) | 1.08e-04    |
| CRP                                          | 1.12 (1.08, 1.17) | 2.15e-08    |

HRs indicate the relative risk of experiencing any chronic event associated with one-SD increase in serum biomarker concentrations or FBG PRS.

HbA1c hemoglobin A1C, FBG fasting blood glucose, CRP C-reactive protein, TG triglyceride, TC total cholesterol, Hb hemoglobin, LDL-C low-density lipoprotein cholesterol, HR hazard ratio, CI confidence interval.

**Supplementary Table 9 Associations of biomarker PRSs with healthspan and lifespan in all participants, men, and women**

| Group | Outcome             | PRS   | Number of individuals | Number of events | Median follow-up year | HR (95%CI)        | FDR-corrected P value | Raw P value |
|-------|---------------------|-------|-----------------------|------------------|-----------------------|-------------------|-----------------------|-------------|
| All   | Any chronic disease | FBG   | 7972                  | 3104             | 9.3                   | 1.05 (1.02, 1.09) | 0.050                 | 0.005       |
| All   | Any chronic disease | HbA1c | 7972                  | 3104             | 9.3                   | 1.04 (1.00, 1.08) | 0.255                 | 0.051       |
| All   | Any chronic disease | TG    | 7972                  | 3104             | 9.3                   | 1.01 (0.98, 1.05) | 0.706                 | 0.423       |
| All   | Any chronic disease | TC    | 7972                  | 3104             | 9.3                   | 1.02 (0.99, 1.06) | 0.630                 | 0.221       |
| All   | Any chronic disease | LDL-C | 7972                  | 3104             | 9.3                   | 1.02 (0.99, 1.06) | 0.630                 | 0.252       |
| All   | Any chronic disease | ApoB  | 7972                  | 3104             | 9.3                   | 1.02 (0.98, 1.05) | 0.706                 | 0.416       |
| All   | Any chronic disease | HDL-C | 7972                  | 3104             | 9.3                   | 1.00 (0.96, 1.03) | 0.948                 | 0.948       |
| All   | Any chronic disease | ApoA1 | 7972                  | 3104             | 9.3                   | 1.00 (0.96, 1.03) | 0.922                 | 0.829       |
| All   | Any chronic disease | CRP   | 7972                  | 3104             | 9.3                   | 0.99 (0.96, 1.03) | 0.922                 | 0.732       |
| All   | Any chronic disease | Hb    | 7972                  | 3104             | 9.3                   | 0.99 (0.96, 1.03) | 0.922                 | 0.780       |
| Men   | Any chronic disease | FBG   | 3572                  | 1649             | 9.2                   | 1.03 (0.98, 1.08) | 0.497                 | 0.212       |
| Men   | Any chronic disease | HbA1c | 3572                  | 1649             | 9.2                   | 1.02 (0.97, 1.07) | 0.850                 | 0.532       |
| Men   | Any chronic disease | TG    | 3572                  | 1649             | 9.2                   | 1.03 (0.98, 1.08) | 0.497                 | 0.191       |
| Men   | Any chronic disease | TC    | 3572                  | 1649             | 9.2                   | 1.03 (0.98, 1.09) | 0.497                 | 0.248       |
| Men   | Any chronic disease | LDL-C | 3572                  | 1649             | 9.2                   | 1.03 (0.98, 1.09) | 0.497                 | 0.207       |
| Men   | Any chronic disease | ApoB  | 3572                  | 1649             | 9.2                   | 1.04 (0.99, 1.09) | 0.497                 | 0.159       |
| Men   | Any chronic disease | HDL-C | 3572                  | 1649             | 9.2                   | 0.99 (0.95, 1.04) | 0.946                 | 0.799       |
| Men   | Any chronic disease | ApoA1 | 3572                  | 1649             | 9.2                   | 1.00 (0.96, 1.05) | 0.946                 | 0.942       |
| Men   | Any chronic disease | CRP   | 3572                  | 1649             | 9.2                   | 1.00 (0.95, 1.05) | 0.946                 | 0.946       |
| Men   | Any chronic disease | Hb    | 3572                  | 1649             | 9.2                   | 0.99 (0.94, 1.04) | 0.850                 | 0.595       |
| Women | Any chronic disease | FBG   | 4400                  | 1455             | 9.6                   | 1.08 (1.02, 1.14) | 0.046                 | 0.005       |
| Women | Any chronic disease | HbA1c | 4400                  | 1455             | 9.6                   | 1.06 (1.01, 1.12) | 0.123                 | 0.025       |
| Women | Any chronic disease | TG    | 4400                  | 1455             | 9.6                   | 0.99 (0.94, 1.05) | 0.871                 | 0.828       |



|       |                     |       |       |      |      |                   |          |          |
|-------|---------------------|-------|-------|------|------|-------------------|----------|----------|
| Women | Any chronic disease | TC    | 4400  | 1455 | 9.6  | 1.02 (0.97, 1.07) | 0.871    | 0.504    |
| Women | Any chronic disease | LDL-C | 4400  | 1455 | 9.6  | 1.01 (0.96, 1.06) | 0.871    | 0.690    |
| Women | Any chronic disease | ApoB  | 4400  | 1455 | 9.6  | 1.00 (0.95, 1.05) | 0.871    | 0.871    |
| Women | Any chronic disease | HDL-C | 4400  | 1455 | 9.6  | 1.01 (0.96, 1.06) | 0.871    | 0.793    |
| Women | Any chronic disease | ApoA1 | 4400  | 1455 | 9.6  | 0.99 (0.94, 1.04) | 0.871    | 0.726    |
| Women | Any chronic disease | CRP   | 4400  | 1455 | 9.6  | 0.99 (0.94, 1.04) | 0.871    | 0.683    |
| Women | Any chronic disease | Hb    | 4400  | 1455 | 9.6  | 1.01 (0.96, 1.06) | 0.871    | 0.772    |
| All   | Death               | FBG   | 10098 | 2264 | 13.0 | 1.00 (0.96, 1.05) | 0.867    | 0.867    |
| All   | Death               | HbA1c | 10098 | 2264 | 13.0 | 1.01 (0.96, 1.05) | 0.867    | 0.805    |
| All   | Death               | TG    | 10098 | 2264 | 13.0 | 1.03 (0.99, 1.08) | 0.251    | 0.126    |
| All   | Death               | TC    | 10098 | 2264 | 13.0 | 1.05 (1.01, 1.10) | 0.064    | 0.019    |
| All   | Death               | LDL-C | 10098 | 2264 | 13.0 | 1.05 (1.01, 1.10) | 0.064    | 0.017    |
| All   | Death               | ApoB  | 10098 | 2264 | 13.0 | 1.05 (1.01, 1.09) | 0.066    | 0.026    |
| All   | Death               | HDL-C | 10098 | 2264 | 13.0 | 0.99 (0.94, 1.03) | 0.643    | 0.514    |
| All   | Death               | ApoA1 | 10098 | 2264 | 13.0 | 0.98 (0.94, 1.03) | 0.643    | 0.452    |
| All   | Death               | CRP   | 10098 | 2264 | 13.0 | 0.91 (0.87, 0.95) | 1.54e-04 | 1.54e-05 |
| All   | Death               | Hb    | 10098 | 2264 | 13.0 | 0.98 (0.94, 1.02) | 0.643    | 0.416    |
| Men   | Death               | FBG   | 4775  | 1309 | 13.0 | 1.00 (0.95, 1.06) | 0.966    | 0.966    |
| Men   | Death               | HbA1c | 4775  | 1309 | 13.0 | 1.03 (0.98, 1.09) | 0.330    | 0.264    |
| Men   | Death               | TG    | 4775  | 1309 | 13.0 | 1.06 (1.00, 1.11) | 0.240    | 0.048    |
| Men   | Death               | TC    | 4775  | 1309 | 13.0 | 1.04 (0.98, 1.10) | 0.329    | 0.200    |
| Men   | Death               | LDL-C | 4775  | 1309 | 13.0 | 1.05 (0.99, 1.11) | 0.255    | 0.099    |
| Men   | Death               | ApoB  | 4775  | 1309 | 13.0 | 1.05 (0.99, 1.11) | 0.255    | 0.102    |
| Men   | Death               | HDL-C | 4775  | 1309 | 13.0 | 0.97 (0.91, 1.02) | 0.329    | 0.229    |
| Men   | Death               | ApoA1 | 4775  | 1309 | 13.0 | 0.97 (0.91, 1.02) | 0.329    | 0.231    |
| Men   | Death               | CRP   | 4775  | 1309 | 13.0 | 0.92 (0.86, 0.97) | 0.048    | 0.005    |

|       |       |       |      |      |      |                   |       |          |
|-------|-------|-------|------|------|------|-------------------|-------|----------|
| Men   | Death | Hb    | 4775 | 1309 | 13-0 | 0.99 (0.93, 1.04) | 0.697 | 0.627    |
| Women | Death | FBG   | 5323 | 955  | 13-0 | 1.01 (0.95, 1.08) | 0.801 | 0.656    |
| Women | Death | HbA1c | 5323 | 955  | 13-0 | 0.97 (0.91, 1.04) | 0.801 | 0.411    |
| Women | Death | TG    | 5323 | 955  | 13-0 | 1.00 (0.94, 1.07) | 0.984 | 0.984    |
| Women | Death | TC    | 5323 | 955  | 13-0 | 1.07 (1.01, 1.14) | 0.148 | 0.030    |
| Women | Death | LDL-C | 5323 | 955  | 13-0 | 1.06 (1.00, 1.13) | 0.212 | 0.064    |
| Women | Death | ApoB  | 5323 | 955  | 13-0 | 1.05 (0.99, 1.12) | 0.249 | 0.099    |
| Women | Death | HDL-C | 5323 | 955  | 13-0 | 1.02 (0.95, 1.09) | 0.801 | 0.576    |
| Women | Death | ApoA1 | 5323 | 955  | 13-0 | 1.01 (0.95, 1.08) | 0.801 | 0.721    |
| Women | Death | CRP   | 5323 | 955  | 13-0 | 0.89 (0.84, 0.95) | 0.008 | 7.79e-04 |
| Women | Death | Hb    | 5323 | 955  | 13-0 | 0.98 (0.92, 1.05) | 0.801 | 0.579    |

FBG fasting blood glucose, HbA1c hemoglobin A1C, TC total cholesterol, HDL-C high-density lipoprotein cholesterol, LDL-C low-density lipoprotein cholesterol, ApoA1 Apolipoprotein A1, ApoB Apolipoprotein B, TG triglyceride, CRP C-reactive protein, Hb hemoglobin.

### Supplementary Table 10 Associations of regional CRP PRS and death

|                                                   | HR (95% CI)       | P values |
|---------------------------------------------------|-------------------|----------|
| CRP PRS and death                                 |                   |          |
| Genome-wide PRS derived from 95 SNPs              | 0.91 (0.87, 0.95) | 1.54e-05 |
| Regional CRP PRS derived from 4 SNPs <sup>1</sup> | 0.94 (0.90, 0.98) | 0.004    |

<sup>1</sup> Derived from rs3093077, rs1205, rs1130864, rs1800947 (*CRP*).

**Supplementary Table 11 Leave-one-disease-out sensitivity analysis**

| Group            | Biomarker | Number of individuals | Number of events | Median follow-up years | HR (95%CI)        | FDR-adjusted P value | Raw P value |
|------------------|-----------|-----------------------|------------------|------------------------|-------------------|----------------------|-------------|
| Serum Biomarker  |           |                       |                  |                        |                   |                      |             |
| All events       | FBG       | 9538                  | 3681             | 9.5                    | 1.28 (1.23, 1.33) | 5.15e-33             | 1.03e-33    |
| All events       | HbA1c     | 9538                  | 3681             | 9.5                    | 1.29 (1.24, 1.34) | 9.07e-37             | 9.07e-38    |
| All events       | TG        | 9538                  | 3681             | 9.5                    | 1.07 (1.03, 1.11) | 0.001                | 6.05e-04    |
| All events       | TC        | 9538                  | 3681             | 9.5                    | 0.96 (0.92, 0.99) | 0.022                | 0.015       |
| All events       | LDL-C     | 9538                  | 3681             | 9.5                    | 0.96 (0.93, 1.00) | 0.060                | 0.048       |
| All events       | ApoB      | 9538                  | 3681             | 9.5                    | 1.00 (0.96, 1.03) | 0.833                | 0.833       |
| All events       | HDL-C     | 9538                  | 3681             | 9.5                    | 0.92 (0.89, 0.96) | 1.51e-04             | 6.03e-05    |
| All events       | ApoA1     | 9538                  | 3681             | 9.5                    | 0.93 (0.89, 0.96) | 2.12e-04             | 1.06e-04    |
| All events       | CRP       | 9538                  | 3681             | 9.5                    | 1.11 (1.08, 1.15) | 2.21e-09             | 6.62e-10    |
| All events       | Hb        | 9538                  | 3681             | 9.5                    | 0.99 (0.95, 1.03) | 0.791                | 0.711       |
| Exclude cancer   | FBG       | 9538                  | 2591             | 9.7                    | 1.44 (1.38, 1.51) | 6.94e-55             | 1.39e-55    |
| Exclude cancer   | HbA1c     | 9538                  | 2591             | 9.7                    | 1.44 (1.38, 1.51) | 1.04e-56             | 1.04e-57    |
| Exclude cancer   | TG        | 9538                  | 2591             | 9.7                    | 1.14 (1.09, 1.19) | 1.68e-08             | 6.72e-09    |
| Exclude cancer   | TC        | 9538                  | 2591             | 9.7                    | 0.94 (0.90, 0.98) | 0.005                | 0.004       |
| Exclude cancer   | LDL-C     | 9538                  | 2591             | 9.7                    | 0.94 (0.90, 0.98) | 0.009                | 0.007       |
| Exclude cancer   | ApoB      | 9538                  | 2591             | 9.7                    | 1.01 (0.96, 1.05) | 0.801                | 0.801       |
| Exclude cancer   | HDL-C     | 9538                  | 2591             | 9.7                    | 0.87 (0.83, 0.92) | 1.27e-07             | 6.37e-08    |
| Exclude cancer   | ApoA1     | 9538                  | 2591             | 9.7                    | 0.89 (0.85, 0.94) | 4.80e-06             | 2.88e-06    |
| Exclude cancer   | CRP       | 9538                  | 2591             | 9.7                    | 1.14 (1.10, 1.19) | 2.73e-10             | 8.18e-11    |
| Exclude cancer   | Hb        | 9538                  | 2591             | 9.7                    | 1.02 (0.97, 1.07) | 0.465                | 0.419       |
| Exclude diabetes | FBG       | 9538                  | 3419             | 9.6                    | 1.05 (1.00, 1.09) | 0.065                | 0.033       |
| Exclude diabetes | HbA1c     | 9538                  | 3419             | 9.6                    | 1.06 (1.01, 1.10) | 0.029                | 0.009       |
| Exclude diabetes | TG        | 9538                  | 3419             | 9.6                    | 1.04 (1.00, 1.08) | 0.079                | 0.048       |

|                  |       |      |      |     |                   |          |          |
|------------------|-------|------|------|-----|-------------------|----------|----------|
| Exclude diabetes | TC    | 9538 | 3419 | 9.6 | 0.99 (0.96, 1.03) | 0.827    | 0.744    |
| Exclude diabetes | LDL-C | 9538 | 3419 | 9.6 | 1.00 (0.97, 1.04) | 0.923    | 0.923    |
| Exclude diabetes | ApoB  | 9538 | 3419 | 9.6 | 1.02 (0.98, 1.05) | 0.540    | 0.378    |
| Exclude diabetes | HDL-C | 9538 | 3419 | 9.6 | 0.95 (0.92, 0.99) | 0.049    | 0.020    |
| Exclude diabetes | ApoA1 | 9538 | 3419 | 9.6 | 0.95 (0.91, 0.99) | 0.029    | 0.007    |
| Exclude diabetes | CRP   | 9538 | 3419 | 9.6 | 1.11 (1.07, 1.15) | 1.17e-07 | 1.17e-08 |
| Exclude diabetes | Hb    | 9538 | 3419 | 9.6 | 0.99 (0.95, 1.03) | 0.653    | 0.522    |
| Exclude MI       | FBG   | 9538 | 3456 | 9.6 | 1.32 (1.27, 1.38) | 3.55e-41 | 7.09e-42 |
| Exclude MI       | HbA1c | 9538 | 3456 | 9.6 | 1.33 (1.27, 1.38) | 4.70e-42 | 4.70e-43 |
| Exclude MI       | TG    | 9538 | 3456 | 9.6 | 1.07 (1.03, 1.11) | 0.002    | 0.001    |
| Exclude MI       | TC    | 9538 | 3456 | 9.6 | 0.94 (0.90, 0.98) | 0.002    | 0.001    |
| Exclude MI       | LDL-C | 9538 | 3456 | 9.6 | 0.94 (0.91, 0.98) | 0.002    | 0.002    |
| Exclude MI       | ApoB  | 9538 | 3456 | 9.6 | 0.98 (0.94, 1.01) | 0.200    | 0.180    |
| Exclude MI       | HDL-C | 9538 | 3456 | 9.6 | 0.93 (0.90, 0.97) | 0.002    | 9.64e-04 |
| Exclude MI       | ApoA1 | 9538 | 3456 | 9.6 | 0.93 (0.90, 0.97) | 0.001    | 5.52e-04 |
| Exclude MI       | CRP   | 9538 | 3456 | 9.6 | 1.11 (1.08, 1.15) | 9.31e-09 | 2.79e-09 |
| Exclude MI       | Hb    | 9538 | 3456 | 9.6 | 0.99 (0.95, 1.03) | 0.594    | 0.594    |
| Exclude stroke   | FBG   | 9538 | 3506 | 9.6 | 1.31 (1.26, 1.37) | 1.14e-39 | 2.28e-40 |
| Exclude stroke   | HbA1c | 9538 | 3506 | 9.6 | 1.33 (1.27, 1.38) | 1.07e-42 | 1.07e-43 |
| Exclude stroke   | TG    | 9538 | 3506 | 9.6 | 1.08 (1.04, 1.12) | 3.07e-04 | 1.84e-04 |
| Exclude stroke   | TC    | 9538 | 3506 | 9.6 | 0.96 (0.92, 0.99) | 0.026    | 0.018    |
| Exclude stroke   | LDL-C | 9538 | 3506 | 9.6 | 0.96 (0.93, 1.00) | 0.058    | 0.046    |
| Exclude stroke   | ApoB  | 9538 | 3506 | 9.6 | 1.00 (0.96, 1.04) | 0.966    | 0.966    |
| Exclude stroke   | HDL-C | 9538 | 3506 | 9.6 | 0.92 (0.88, 0.96) | 8.36e-05 | 4.05e-05 |
| Exclude stroke   | ApoA1 | 9538 | 3506 | 9.6 | 0.92 (0.88, 0.96) | 8.36e-05 | 4.18e-05 |
| Exclude stroke   | CRP   | 9538 | 3506 | 9.6 | 1.11 (1.08, 1.16) | 6.33e-09 | 1.90e-09 |

|                  |       |      |      |     |                   |          |          |
|------------------|-------|------|------|-----|-------------------|----------|----------|
| Exclude stroke   | Hb    | 9538 | 3506 | 9.6 | 1.00 (0.96, 1.04) | 0.966    | 0.911    |
| Exclude CHF      | FBG   | 9538 | 3578 | 9.6 | 1.29 (1.24, 1.35) | 1.28e-35 | 2.56e-36 |
| Exclude CHF      | HbA1c | 9538 | 3578 | 9.6 | 1.31 (1.26, 1.36) | 2.34e-39 | 2.34e-40 |
| Exclude CHF      | TG    | 9538 | 3578 | 9.6 | 1.08 (1.04, 1.12) | 2.63e-04 | 1.58e-04 |
| Exclude CHF      | TC    | 9538 | 3578 | 9.6 | 0.96 (0.92, 0.99) | 0.022    | 0.016    |
| Exclude CHF      | LDL-C | 9538 | 3578 | 9.6 | 0.96 (0.93, 1.00) | 0.068    | 0.055    |
| Exclude CHF      | ApoB  | 9538 | 3578 | 9.6 | 1.00 (0.96, 1.03) | 0.927    | 0.927    |
| Exclude CHF      | HDL-C | 9538 | 3578 | 9.6 | 0.91 (0.88, 0.95) | 3.12e-05 | 1.25e-05 |
| Exclude CHF      | ApoA1 | 9538 | 3578 | 9.6 | 0.92 (0.89, 0.96) | 1.09e-04 | 5.43e-05 |
| Exclude CHF      | CRP   | 9538 | 3578 | 9.6 | 1.11 (1.07, 1.15) | 1.27e-08 | 3.80e-09 |
| Exclude CHF      | Hb    | 9538 | 3578 | 9.6 | 1.00 (0.96, 1.04) | 0.927    | 0.870    |
| Exclude COPD     | FBG   | 9538 | 3585 | 9.6 | 1.28 (1.23, 1.33) | 7.43e-33 | 1.49e-33 |
| Exclude COPD     | HbA1c | 9538 | 3585 | 9.6 | 1.30 (1.25, 1.35) | 1.89e-37 | 1.89e-38 |
| Exclude COPD     | TG    | 9538 | 3585 | 9.6 | 1.06 (1.02, 1.10) | 0.003    | 0.002    |
| Exclude COPD     | TC    | 9538 | 3585 | 9.6 | 0.96 (0.92, 0.99) | 0.030    | 0.021    |
| Exclude COPD     | LDL-C | 9538 | 3585 | 9.6 | 0.97 (0.93, 1.00) | 0.108    | 0.086    |
| Exclude COPD     | ApoB  | 9538 | 3585 | 9.6 | 1.00 (0.96, 1.03) | 0.876    | 0.876    |
| Exclude COPD     | HDL-C | 9538 | 3585 | 9.6 | 0.92 (0.88, 0.96) | 1.07e-04 | 4.27e-05 |
| Exclude COPD     | ApoA1 | 9538 | 3585 | 9.6 | 0.92 (0.89, 0.96) | 1.42e-04 | 7.12e-05 |
| Exclude COPD     | CRP   | 9538 | 3585 | 9.6 | 1.11 (1.07, 1.15) | 2.10e-08 | 6.31e-09 |
| Exclude COPD     | Hb    | 9538 | 3585 | 9.6 | 0.98 (0.94, 1.02) | 0.468    | 0.421    |
| Exclude dementia | FBG   | 9538 | 3574 | 9.6 | 1.29 (1.24, 1.34) | 1.54e-34 | 3.09e-35 |
| Exclude dementia | HbA1c | 9538 | 3574 | 9.6 | 1.31 (1.26, 1.36) | 2.53e-39 | 2.53e-40 |
| Exclude dementia | TG    | 9538 | 3574 | 9.6 | 1.07 (1.03, 1.11) | 0.001    | 7.33e-04 |
| Exclude dementia | TC    | 9538 | 3574 | 9.6 | 0.95 (0.91, 0.98) | 0.006    | 0.004    |
| Exclude dementia | LDL-C | 9538 | 3574 | 9.6 | 0.96 (0.92, 0.99) | 0.020    | 0.016    |

|                  |       |      |      |     |                   |          |          |
|------------------|-------|------|------|-----|-------------------|----------|----------|
| Exclude dementia | ApoB  | 9538 | 3574 | 9.6 | 0.99 (0.96, 1.03) | 0.644    | 0.579    |
| Exclude dementia | HDL-C | 9538 | 3574 | 9.6 | 0.92 (0.88, 0.96) | 8.08e-05 | 3.23e-05 |
| Exclude dementia | ApoA1 | 9538 | 3574 | 9.6 | 0.93 (0.89, 0.96) | 2.90e-04 | 1.45e-04 |
| Exclude dementia | CRP   | 9538 | 3574 | 9.6 | 1.12 (1.09, 1.16) | 1.53e-10 | 4.60e-11 |
| Exclude dementia | Hb    | 9538 | 3574 | 9.6 | 1.00 (0.96, 1.04) | 0.947    | 0.947    |
| Biomarker PRS    |       |      |      |     |                   |          |          |
| All events       | FBG   | 7972 | 3104 | 9.3 | 1.05 (1.02, 1.09) | 0.050    | 0.005    |
| All events       | HbA1c | 7972 | 3104 | 9.3 | 1.04 (1.00, 1.08) | 0.255    | 0.051    |
| All events       | TG    | 7972 | 3104 | 9.3 | 1.01 (0.98, 1.05) | 0.706    | 0.423    |
| All events       | TC    | 7972 | 3104 | 9.3 | 1.02 (0.99, 1.06) | 0.630    | 0.221    |
| All events       | LDL-C | 7972 | 3104 | 9.3 | 1.02 (0.99, 1.06) | 0.630    | 0.252    |
| All events       | ApoB  | 7972 | 3104 | 9.3 | 1.02 (0.98, 1.05) | 0.706    | 0.416    |
| All events       | HDL-C | 7972 | 3104 | 9.3 | 1.00 (0.96, 1.03) | 0.948    | 0.948    |
| All events       | ApoA1 | 7972 | 3104 | 9.3 | 1.00 (0.96, 1.03) | 0.922    | 0.829    |
| All events       | CRP   | 7972 | 3104 | 9.3 | 0.99 (0.96, 1.03) | 0.922    | 0.732    |
| All events       | Hb    | 7972 | 3104 | 9.3 | 0.99 (0.96, 1.03) | 0.922    | 0.780    |
| Exclude cancer   | FBG   | 7972 | 2201 | 9.7 | 1.08 (1.04, 1.13) | 0.002    | 1.84e-04 |
| Exclude cancer   | HbA1c | 7972 | 2201 | 9.7 | 1.04 (0.99, 1.08) | 0.175    | 0.087    |
| Exclude cancer   | TG    | 7972 | 2201 | 9.7 | 1.03 (0.99, 1.07) | 0.273    | 0.191    |
| Exclude cancer   | TC    | 7972 | 2201 | 9.7 | 1.07 (1.02, 1.11) | 0.024    | 0.005    |
| Exclude cancer   | LDL-C | 7972 | 2201 | 9.7 | 1.06 (1.01, 1.10) | 0.045    | 0.014    |
| Exclude cancer   | ApoB  | 7972 | 2201 | 9.7 | 1.05 (1.01, 1.10) | 0.062    | 0.025    |
| Exclude cancer   | HDL-C | 7972 | 2201 | 9.7 | 0.99 (0.95, 1.04) | 0.859    | 0.784    |
| Exclude cancer   | ApoA1 | 7972 | 2201 | 9.7 | 0.99 (0.95, 1.04) | 0.859    | 0.781    |
| Exclude cancer   | CRP   | 7972 | 2201 | 9.7 | 0.97 (0.92, 1.01) | 0.185    | 0.111    |
| Exclude cancer   | Hb    | 7972 | 2201 | 9.7 | 1.00 (0.96, 1.05) | 0.859    | 0.859    |

|                  |       |      |      |     |                   |       |       |
|------------------|-------|------|------|-----|-------------------|-------|-------|
| Exclude diabetes | FBG   | 7972 | 2874 | 9-6 | 1-02 (0-99, 1-06) | 0-882 | 0-220 |
| Exclude diabetes | HbA1c | 7972 | 2874 | 9-6 | 1-01 (0-97, 1-05) | 0-882 | 0-717 |
| Exclude diabetes | TG    | 7972 | 2874 | 9-6 | 1-02 (0-98, 1-05) | 0-882 | 0-420 |
| Exclude diabetes | TC    | 7972 | 2874 | 9-6 | 1-01 (0-97, 1-05) | 0-882 | 0-552 |
| Exclude diabetes | LDL-C | 7972 | 2874 | 9-6 | 1-01 (0-98, 1-05) | 0-882 | 0-474 |
| Exclude diabetes | ApoB  | 7972 | 2874 | 9-6 | 1-00 (0-97, 1-04) | 0-882 | 0-793 |
| Exclude diabetes | HDL-C | 7972 | 2874 | 9-6 | 1-00 (0-97, 1-04) | 0-946 | 0-946 |
| Exclude diabetes | ApoA1 | 7972 | 2874 | 9-6 | 0-99 (0-96, 1-03) | 0-882 | 0-786 |
| Exclude diabetes | CRP   | 7972 | 2874 | 9-6 | 0-99 (0-95, 1-03) | 0-882 | 0-646 |
| Exclude diabetes | Hb    | 7972 | 2874 | 9-6 | 0-99 (0-95, 1-03) | 0-882 | 0-586 |
| Exclude MI       | FBG   | 7972 | 2913 | 9-5 | 1-05 (1-01, 1-09) | 0-092 | 0-009 |
| Exclude MI       | HbA1c | 7972 | 2913 | 9-5 | 1-04 (1-00, 1-08) | 0-233 | 0-047 |
| Exclude MI       | TG    | 7972 | 2913 | 9-5 | 1-01 (0-98, 1-05) | 0-950 | 0-531 |
| Exclude MI       | TC    | 7972 | 2913 | 9-5 | 1-01 (0-97, 1-05) | 0-950 | 0-549 |
| Exclude MI       | LDL-C | 7972 | 2913 | 9-5 | 1-01 (0-97, 1-05) | 0-950 | 0-665 |
| Exclude MI       | ApoB  | 7972 | 2913 | 9-5 | 1-00 (0-97, 1-04) | 0-993 | 0-893 |
| Exclude MI       | HDL-C | 7972 | 2913 | 9-5 | 1-00 (0-96, 1-04) | 0-993 | 0-993 |
| Exclude MI       | ApoA1 | 7972 | 2913 | 9-5 | 1-00 (0-96, 1-04) | 0-993 | 0-961 |
| Exclude MI       | CRP   | 7972 | 2913 | 9-5 | 0-99 (0-95, 1-03) | 0-950 | 0-635 |
| Exclude MI       | Hb    | 7972 | 2913 | 9-5 | 0-98 (0-95, 1-02) | 0-950 | 0-413 |
| Exclude stroke   | FBG   | 7972 | 2955 | 9-5 | 1-05 (1-01, 1-09) | 0-147 | 0-015 |
| Exclude stroke   | HbA1c | 7972 | 2955 | 9-5 | 1-04 (1-00, 1-08) | 0-277 | 0-055 |
| Exclude stroke   | TG    | 7972 | 2955 | 9-5 | 1-01 (0-97, 1-04) | 0-854 | 0-769 |
| Exclude stroke   | TC    | 7972 | 2955 | 9-5 | 1-02 (0-98, 1-05) | 0-726 | 0-406 |
| Exclude stroke   | LDL-C | 7972 | 2955 | 9-5 | 1-02 (0-98, 1-06) | 0-726 | 0-284 |
| Exclude stroke   | ApoB  | 7972 | 2955 | 9-5 | 1-01 (0-98, 1-05) | 0-726 | 0-491 |

|                  |       |      |      |     |                   |       |       |
|------------------|-------|------|------|-----|-------------------|-------|-------|
| Exclude stroke   | HDL-C | 7972 | 2955 | 9.5 | 0.99 (0.96, 1.03) | 0.829 | 0.663 |
| Exclude stroke   | ApoA1 | 7972 | 2955 | 9.5 | 0.99 (0.95, 1.02) | 0.726 | 0.438 |
| Exclude stroke   | CRP   | 7972 | 2955 | 9.5 | 0.99 (0.95, 1.02) | 0.726 | 0.508 |
| Exclude stroke   | Hb    | 7972 | 2955 | 9.5 | 1.00 (0.96, 1.03) | 0.866 | 0.866 |
| Exclude CHF      | FBG   | 7972 | 3025 | 9.5 | 1.05 (1.02, 1.09) | 0.043 | 0.004 |
| Exclude CHF      | HbA1c | 7972 | 3025 | 9.5 | 1.04 (1.00, 1.08) | 0.160 | 0.032 |
| Exclude CHF      | TG    | 7972 | 3025 | 9.5 | 1.01 (0.98, 1.05) | 0.704 | 0.466 |
| Exclude CHF      | TC    | 7972 | 3025 | 9.5 | 1.02 (0.98, 1.06) | 0.704 | 0.311 |
| Exclude CHF      | LDL-C | 7972 | 3025 | 9.5 | 1.02 (0.98, 1.05) | 0.704 | 0.424 |
| Exclude CHF      | ApoB  | 7972 | 3025 | 9.5 | 1.01 (0.98, 1.05) | 0.704 | 0.525 |
| Exclude CHF      | HDL-C | 7972 | 3025 | 9.5 | 1.00 (0.96, 1.04) | 0.978 | 0.978 |
| Exclude CHF      | ApoA1 | 7972 | 3025 | 9.5 | 1.00 (0.96, 1.03) | 0.978 | 0.915 |
| Exclude CHF      | CRP   | 7972 | 3025 | 9.5 | 0.99 (0.95, 1.03) | 0.704 | 0.563 |
| Exclude CHF      | Hb    | 7972 | 3025 | 9.5 | 0.99 (0.95, 1.02) | 0.704 | 0.515 |
| Exclude COPD     | FBG   | 7972 | 3025 | 9.5 | 1.06 (1.02, 1.09) | 0.039 | 0.004 |
| Exclude COPD     | HbA1c | 7972 | 3025 | 9.5 | 1.05 (1.01, 1.09) | 0.069 | 0.014 |
| Exclude COPD     | TG    | 7972 | 3025 | 9.5 | 1.01 (0.98, 1.05) | 0.875 | 0.525 |
| Exclude COPD     | TC    | 7972 | 3025 | 9.5 | 1.03 (0.99, 1.07) | 0.352 | 0.116 |
| Exclude COPD     | LDL-C | 7972 | 3025 | 9.5 | 1.03 (0.99, 1.07) | 0.352 | 0.141 |
| Exclude COPD     | ApoB  | 7972 | 3025 | 9.5 | 1.02 (0.98, 1.06) | 0.598 | 0.299 |
| Exclude COPD     | HDL-C | 7972 | 3025 | 9.5 | 1.00 (0.97, 1.04) | 0.943 | 0.862 |
| Exclude COPD     | ApoA1 | 7972 | 3025 | 9.5 | 1.00 (0.96, 1.04) | 0.943 | 0.943 |
| Exclude COPD     | CRP   | 7972 | 3025 | 9.5 | 1.00 (0.96, 1.03) | 0.943 | 0.879 |
| Exclude COPD     | Hb    | 7972 | 3025 | 9.5 | 0.99 (0.96, 1.03) | 0.943 | 0.754 |
| Exclude dementia | FBG   | 7972 | 3016 | 9.5 | 1.05 (1.01, 1.09) | 0.061 | 0.006 |
| Exclude dementia | HbA1c | 7972 | 3016 | 9.5 | 1.04 (1.00, 1.08) | 0.138 | 0.028 |



---

|                  |       |      |      |     |                   |       |       |
|------------------|-------|------|------|-----|-------------------|-------|-------|
| Exclude dementia | TG    | 7972 | 3016 | 9.5 | 1.01 (0.98, 1.05) | 0.943 | 0.516 |
| Exclude dementia | TC    | 7972 | 3016 | 9.5 | 1.02 (0.98, 1.06) | 0.943 | 0.350 |
| Exclude dementia | LDL-C | 7972 | 3016 | 9.5 | 1.02 (0.98, 1.05) | 0.943 | 0.378 |
| Exclude dementia | ApoB  | 7972 | 3016 | 9.5 | 1.01 (0.97, 1.05) | 0.943 | 0.572 |
| Exclude dementia | HDL-C | 7972 | 3016 | 9.5 | 1.00 (0.97, 1.04) | 0.996 | 0.996 |
| Exclude dementia | ApoA1 | 7972 | 3016 | 9.5 | 1.00 (0.97, 1.04) | 0.996 | 0.982 |
| Exclude dementia | CRP   | 7972 | 3016 | 9.5 | 1.01 (0.97, 1.04) | 0.943 | 0.755 |
| Exclude dementia | Hb    | 7972 | 3016 | 9.5 | 0.99 (0.96, 1.03) | 0.943 | 0.713 |

---

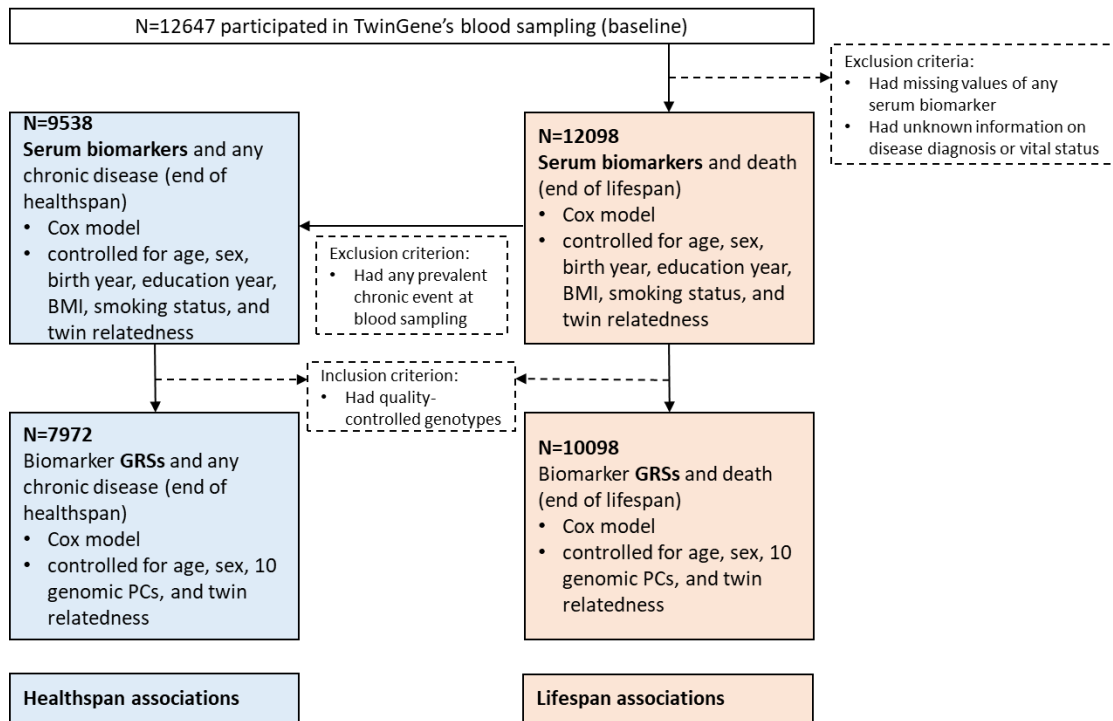

**Supplementary Figure 1 Study design and study population**

Of all TwinGene participants, a total of 12098 and 2024 qualified individuals had serum clinical biomarkers and serum non-targeted metabolites assessed, respectively. Individuals who had a previous diagnosis of any event were excluded in the healthspan analyses. Of all included participants, 10098 of them had quality controlled genotype data and were included in the genetic association analyses.

BMI body mass index, PRS polygenic risk score, PC principal component

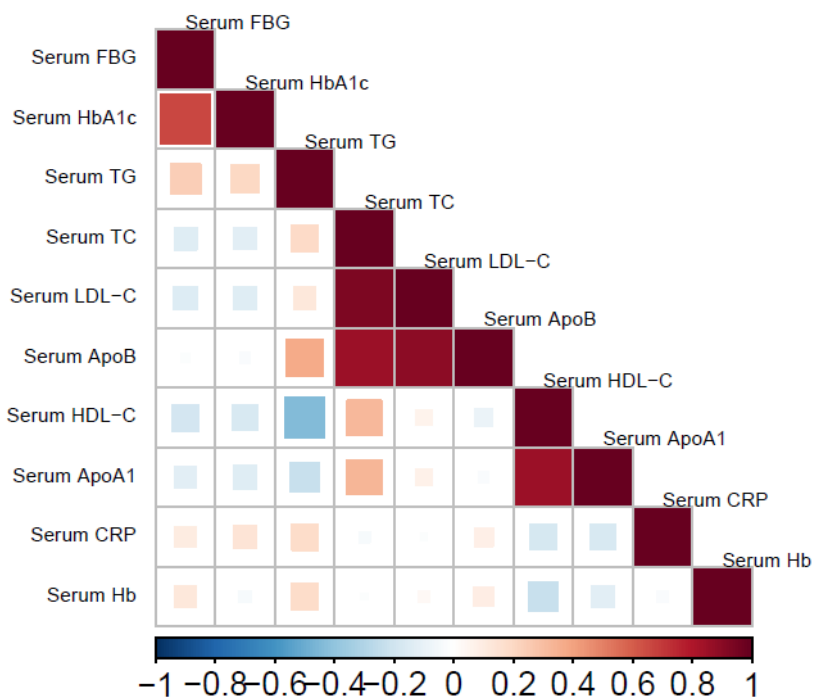

**Supplementary Figure 2 Correlations of serum biomarkers**

Cells of the heatmap represent the correlations between serum biomarker pairs, Color density of each cell indicates the magnitude of Pearson correlation coefficients, with red and blue showing positive and negative correlations, respectively. Glycemic and lipid biomarkers constituted three clusters of high correlations, namely 1) FBG and HbA1c, 2) TC, LDL-C, and ApoB, and 3) HDL-C and ApoA1.

FBG fasting blood glucose, HbA1c hemoglobin A1C, TC total cholesterol, HDL-C high-density lipoprotein cholesterol, LDL-C low-density lipoprotein cholesterol, ApoA1 Apolipoprotein A1, ApoB Apolipoprotein B, TG triglyceride, CRP C-reactive protein, Hb hemoglobin.

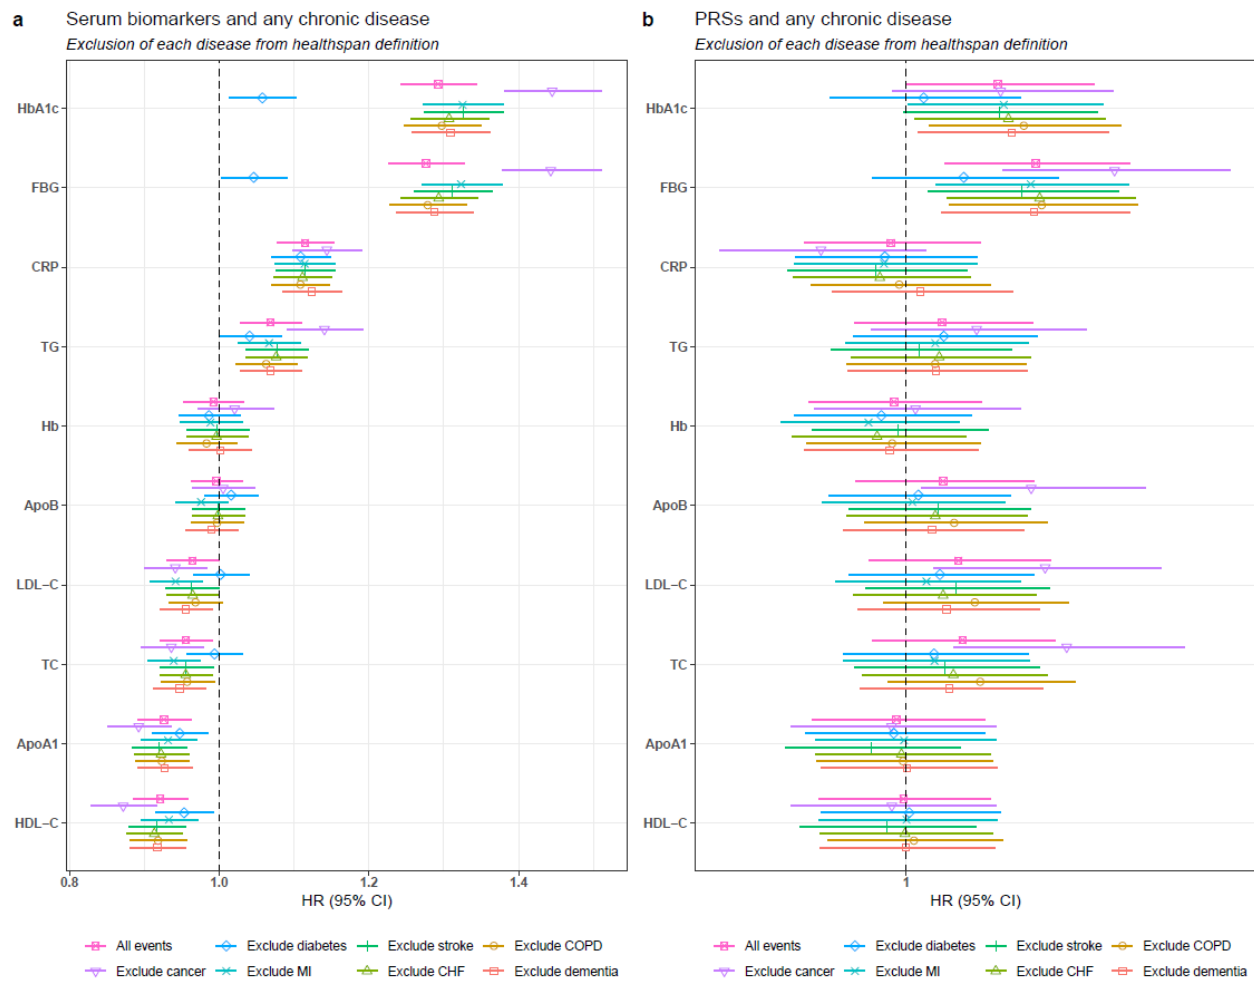

### Supplementary Figure 3 Leave-one-disease-out sensitivity analysis

Supplementary Figure 3 shows the HR (95% CI) of any chronic disease that are associated with one-SD increase in serum biomarker concentration (Panel a) and PRS (Panel b). For each relationship, we estimated the relative risks among all participants and among subsets of study population after exclusion of individuals whose healthspan were ended due to the same disease.

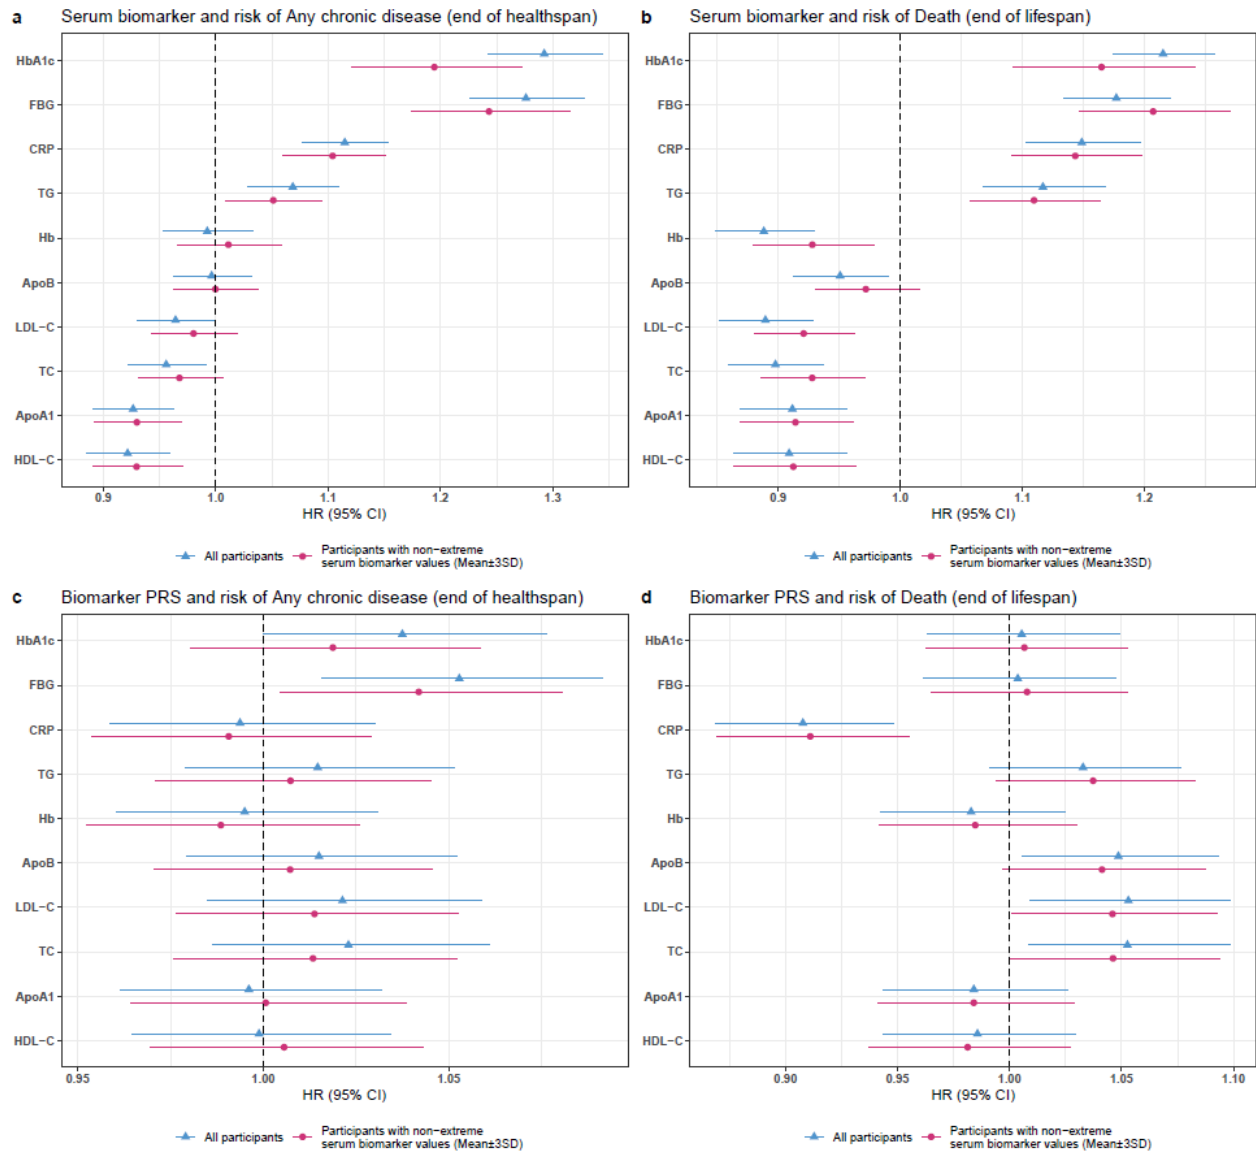

**Supplementary Figure 4 Sensitivity analysis with the exclusion of serum biomarker outliers**

Panel a-d illustrated the associations, quantified as HR (95% CI), of biomarkers with any chronic disease and death, respectively. HRs indicate the relative risk of experiencing any chronic disease or death associated with one-SD increase in serum biomarker concentrations or biomarker PRSs. Results estimated among the whole study population and among the non-outlier participants were showed in color blue and red, respectively.

## Reference

1. Finkel D, Pedersen NL. Processing speed and longitudinal trajectories of change for cognitive abilities: The Swedish Adoption/Twin Study of Aging. *Aging Neuropsychol C* 2004; **11**(2-3): 325-45.
